# Supplementary material for: Spatiotemporally controlled genetic perturbation for efficient large-scale studies of cell non-autonomous effects
Source: eLife. 2018 Nov 27;7:e38393. doi: 10.7554/eLife.38393 (PMC6320068; doi:10.7554/eLife.38393)
Supplement: Figure 2—figure supplement 1—source data 1. [file elife-38393-fig2-figsupp1-data1.xlsx]

## Sheet: Sheet1
			Source data for Supplementary Figure 2
Genotype	WT		FOFO2.0-brat-nEGFP-G4			FOFO2.0-pros-nls-G4
	-	hs-FLP;hs-mFLP5	hs-FLP	hs-mFLP5	hs-FLP;hs-mFLP5	hs-FLP	hs-mFLP5
hs conditions		no hs	2x hs	2x hs	no hs	2x hs	2x hs
	101	100	108	91	91	93	99
No. Mira+ cells	94	90	105	92	92	101	97
	91	105	104	95	100	101	89
	97	115	86	95	100	100	96
	94	94	93	91	89	101	89
	90	89	94	90	102	97	95
	97	100	99	104	100	96	93
	92	96	93	96	93	91	92
	97	102	94	100	97	90	108
	96	103	88	97	100	91	102
	99	90	92	96	95	93	91
	90	88	103				101
	98
Average	95.0769	97.6667	96.5833	95.1818	96.2727	95.8182	96
Standard Deviation	3.5464	8.06038	7.0641	4.21469	4.47417	4.42308	5.95132
Normal distribution (Lilliefors test)	Yes	Yes	Yes	Yes	Yes	Yes	Yes
t-test Two tailed p value					0.472697	0.652941	0.630637
			All statistical tests were comparison with WT
Ordinary One Way ANOVA Multiple Comparisons
Number of families	1
Number of comparisons per family	6
Alpha	0.05
Dunnett's multiple comparisons test	Mean Diff.	95.00% CI of diff.	Significant?	Summary	Adjusted P Value	A-?
WT vs. FOFO2.0-brat with hs-FLP;hs-mFLP5 & no hs	-2.59	-8.478 to 3.298	No	ns	0.7177	B
WT vs. FOFO2.0-brat with hs-FLP & 2x hs	-1.506	-7.394 to 4.382	No	ns	0.964	C
WT vs.FOFO2.0- brat with hs-mFLP5 & 2x hs	-0.1049	-6.131 to 5.921	No	ns	0.9999	D
WT vs. FOFO2.0-pros with hs-FLP;hs-mFLP5 & no hs	-1.196	-7.221 to 4.83	No	ns	0.9899	E
WT vs.FOFO2.0- pros with hs-FLP & 2x hs	-0.7413	-6.767 to 5.284	No	ns	0.9995	F
WT vs. FOFO2.0-pros with hs-mFLP5 & 2x hs	-0.9231	-6.811 to 4.965	No	ns	0.9963	G
Test details	Mean 1	Mean 2	Mean Diff.	SE of diff.	n1	n2	q	DF
WT vs. FOFO2.0-brat with hs-FLP;hs-mFLP5 & no hs	95.08	97.67	-2.59	2.242	13	12	1.155	75
WT vs. FOFO2.0-brat with hs-FLP & 2x hs	95.08	96.58	-1.506	2.242	13	12	0.672	75
WT vs. FOFO2.0- brat with hs-mFLP5 & 2x hs	95.08	95.18	-0.1049	2.294	13	11	0.04572	75
WT vs. FOFO2.0-pros with hs-FLP;hs-mFLP5 & no hs	95.08	96.27	-1.196	2.294	13	11	0.5212	75
WT vs. FOFO2.0- pros with hs-FLP & 2x hs	95.08	95.82	-0.7413	2.294	13	11	0.3231	75
WT vs. FOFO2.0-pros with hs-mFLP5 & 2x hs	95.08	96	-0.9231	2.242	13	12	0.4118	75
