# Supplementary material for: Spatiotemporally controlled genetic perturbation for efficient large-scale studies of cell non-autonomous effects
Source: eLife. 2018 Nov 27;7:e38393. doi: 10.7554/eLife.38393 (PMC6320068; doi:10.7554/eLife.38393)
Supplement: Figure 6—source data 1. [file elife-38393-fig6-data1.xlsx]

## Sheet: Data
Tumour vol. (AU)	2HS Homoz.				2HS Het				1HS Het
Lobe	Right	Left			Right	Left			Right	Left
Samples	4038495	2812198			4293988	4188393			328677	0
	2154885	1839780			1884708	510340			175279	0
	2152192	2547586			2488838	2605826			442744	300753
	6031436	5566095			0	849604			302866	238111
	2991500	1286544			2400482	2909479			593168	0
	2168310	1991896			1266037	3642727			408353	177076
	4608574	3879491			1314427	1400075			116459	0
	1568500	1239978			1345483	2449434			0	45216
	3685542	3632691			2008155	1105886			373513	458129
	3048756	2742526			1387014	1448114			1322404	1252382
	3950774	2357882			3251874	2643107			2971747	3233932
	3553449	3113331			3298553	3699088			294954	223664
	4945855	5192908			1534674	1513042			213195	0
	2963119	2017451			1949765	1942866			2173182	1008033
					1263234	2101881			18948	389008
					1997822	1454961			1749847	2176386
					2145418	2258822			195611	1476410
					825542	967011			108041	133526
					1528028	257561
					1033158	1022174
	2HS Homoz.				2HS Het				1HS Het
	SUM (R+L)	Difference b/w lobes	Normalized difference		SUM (R+L)	Difference b/w lobes	Normalized difference		SUM (R+L)	Difference b/w lobes	Normalized difference
	6850693	1226297	0.179003		8482381	105595	0.012		328677	328677	1
	3994665	315105	0.0788815		2395048	1374368	0.574		175279	175279	1
	4699778	395394	0.0841304		5094664	116988	0.023		743497	141991	0.191
	11597531	465341	0.0401241		849604	849604	1		540977	64755	0.12
	4278044	1704956	0.398536		5309961	508997	0.096		593168	593168	1
	4160206	176414	0.0424051		4908764	2376690	0.484173		585429	231277	0.395
	8488065	729083	0.0858951		2714502	85648	0.032		116459	116459	1
	2808478	328522	0.116975		3794917	1103951	0.291		45216	45216	1
	7318233	52851	0.00722183		3114041	902269	0.29		831642	84616	0.102
	5791282	306230	0.0528778		2835128	61100	0.022		2574786	70022	0.027
	6308656	1592892	0.252493		5894981	608767	0.103		6205679	262185	0.042
	6666780	440118	0.0660166		6997641	400535	0.057		518618	71290	0.137
	10138763	247053	0.0243672		3047716	21632	0.007		213195	213195	1
	4980570	945668	0.189871		3892631	6899	0.002		3181215	1165149	0.366
					3365115	838647	0.249		407956	370060	0.907
					3452783	542861	0.157		3926233	426539	0.109
					4404240	113404	0.026		1672021	1280799	0.766
					1792553	141469	0.079		241567	25485	0.105
					1785589	1270467	0.712
					2055332	10984	0.005
Mean	6291553	637566	0.116		3.80938e+06	572044	0.211019		1272312	314787	0.515
Stdev	2477498	529550	0.107		1.88291e+06	616404	0.277871		1.6673e+06	363747	0.422
Normal distribution (Shapiro Wilk test)	Yes	No	No		Yes	No	No		No	No	No

## Sheet: Kruskal-Wallis test
Kruskal-Wallis test for normalized difference									Kruskal-Wallis test for sum of tumour vol. of both lobes
P value	0.0045								P value	<0.0001
Exact or approximate P value?	Approximate								Exact or approximate P value?	Approximate
P value summary	**								P value summary	****
Do the medians vary signif. (P < 0.05)?	Yes								Do the medians vary signif. (P < 0.05)?	Yes
Number of groups	3								Number of groups	3
Kruskal-Wallis statistic	10.81								Kruskal-Wallis statistic	28.35
Data summary									Data summary
Number of treatments (columns)	3								Number of treatments (columns)	3
Number of values (total)	52								Number of values (total)	52
Kruskal-Wallis test									Kruskal-Wallis test
Multiple comparisons									Multiple comparisons
Number of families	1								Number of families	1
Number of comparisons per family	3								Number of comparisons per family	3
Alpha	0.05								Alpha	0.05
Dunn's multiple comparisons test	Mean rank diff.	Significant?	Summary	Adjusted P Value					Dunn's multiple comparisons test	Mean rank diff.	Significant?	Summary	Adjusted P Value
2HS Homoz. vs. 2HS Het.	-0.8857	No	ns	>0.9999					2HS Homoz. vs. 2HS Het.	11.86	No	ns	0.0743	A-B
2HS Homoz. vs. 1HS Het.	-15.01	Yes	*	0.0162					2HS Homoz. vs. 1HS Het.	28.3	Yes	****	<0.0001	A-C
2HS Het. vs. 1HS Het.	-14.12	Yes	*	0.0122					2HS Het. vs. 1HS Het.	16.44	Yes	**	0.0025	B-C
Test details	Mean rank 1	Mean rank 2	Mean rank diff.	n1	n2				Test details	Mean rank 1	Mean rank 2	Mean rank diff.	n1	n2
2HS Homoz. vs. 2HS Het.	20.96	21.85	-0.8857	14	20				2HS Homoz. vs. 2HS Het.	40.86	29	11.86	14	20
2HS Homoz. vs. 1HS Het.	20.96	35.97	-15.01	14	18				2HS Homoz. vs. 1HS Het.	40.86	12.56	28.3	14	18
2HS Het. vs. 1HS Het.	21.85	35.97	-14.12	20	18				2HS Het. vs. 1HS Het.	29	12.56	16.44	20	18
Number of values	14	20	18
Minimum	0.007	0.002	0.027
25% Percentile	0.0415	0.02225	0.108
Median	0.0815	0.0875	0.3805
75% Percentile	0.1818	0.2908	1
Maximum	0.399	1	1
Mean	0.1156	0.2111	0.5148
Std. Deviation	0.1072	0.2779	0.4224
Std. Error of Mean	0.02865	0.06215	0.09957
Lower 95% CI	0.05368	0.08099	0.3048
Upper 95% CI	0.1775	0.3411	0.7249
Mean ranks	20.96	21.85	35.97
