# Supplementary material for: Spatiotemporally controlled genetic perturbation for efficient large-scale studies of cell non-autonomous effects
Source: eLife journal article supplement (doi:10.7554/elife.38393), 2018-11-27
Supplement: supp [file elife_poa_e38393_Figure_2_figure_supplement_1.pdf › elife_poa_e38393_Figure_2_figure_supplement_1.pdf]

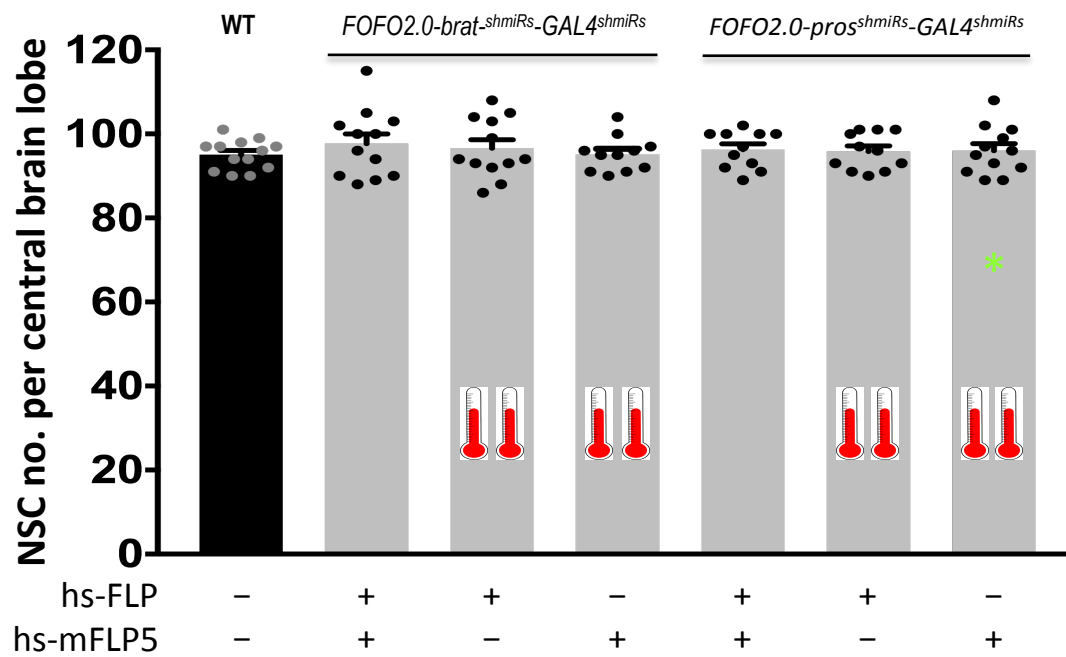

**Figure 2–Figure supplement 1** FOF02.0 precludes formation of supernumerary NSCs unless both FLP and mFLP5 are provided. Quantification of the number of NSCs (identified by expression of Miranda) per brain lobe in third-instar larvae of the indicated genotypes (above histograms) crossed to either both hs-FLP and hs-mFLP5 or just one of them (as indicated below graph), subjected or not to heat-shock (indicated by thermometers). One brain lobe per animal was picked at random. Histograms heights represent the mean and error bars the S.D.. There was no statistically significant difference between any of the conditions. Data points shown were collected from two biological replicates (in order of histograms presented: n=13; n=12, p=0.7177; n=12, p=0.964; n=11, p=0.9999; n=11, p=0.9899; n=11, p=0.9995; n=12, p=0.9963).

\* At low frequency (0.3 %) tumors were observed in heat-shocked animals carrying only hs-mFLP5 and *FOF02.0-pros<sup>shmiRs</sup>-GAL4<sup>shmiRs</sup>*; tumors were labeled by EGFP expression and in those cases only NSCs outside the green domain were counted.
