# Supplementary material for: Spatiotemporally controlled genetic perturbation for efficient large-scale studies of cell non-autonomous effects
Source: eLife journal article supplement (doi:10.7554/elife.38393), 2018-11-27
Supplement: supp [file elife_poa_e38393_Figure_4_figure_supplement_1.pdf › elife_poa_e38393_Figure_4_figure_supplement_1.pdf]

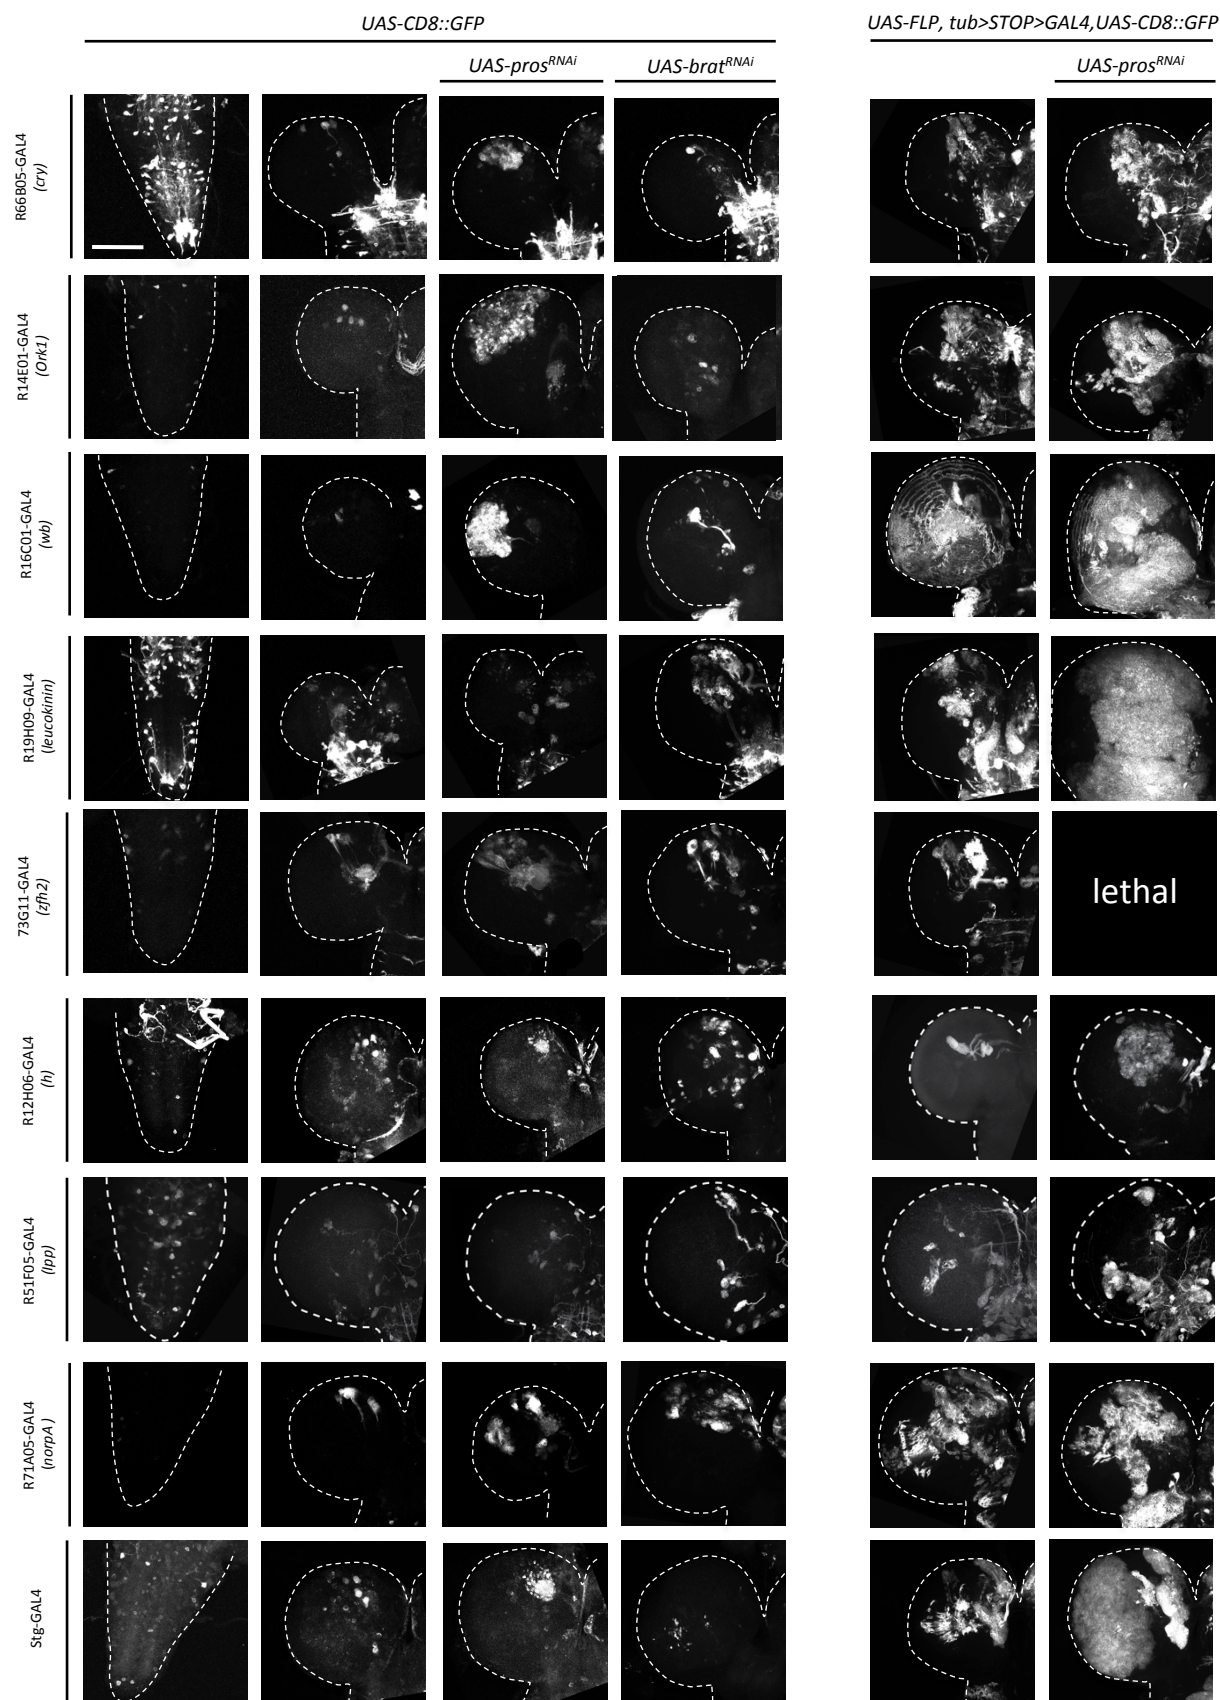

**Figure 4—Figure supplement 1.** Examples of wandering third-instar larval CNSs of indicated genotypes. The left column contains images of ventral nerve cords and all other images are of brain lobes. All images are maximum intensity projections of Z-series. Images are of a representative example obtained from two biological replicates (n>10 per condition). Scale bar: 100  $\mu$ m.
