# Supplementary figures and images for: Spatiotemporally controlled genetic perturbation for efficient large-scale studies of cell non-autonomous effects
Source: eLife journal article supplement (doi:10.7554/elife.38393), 2018-11-27

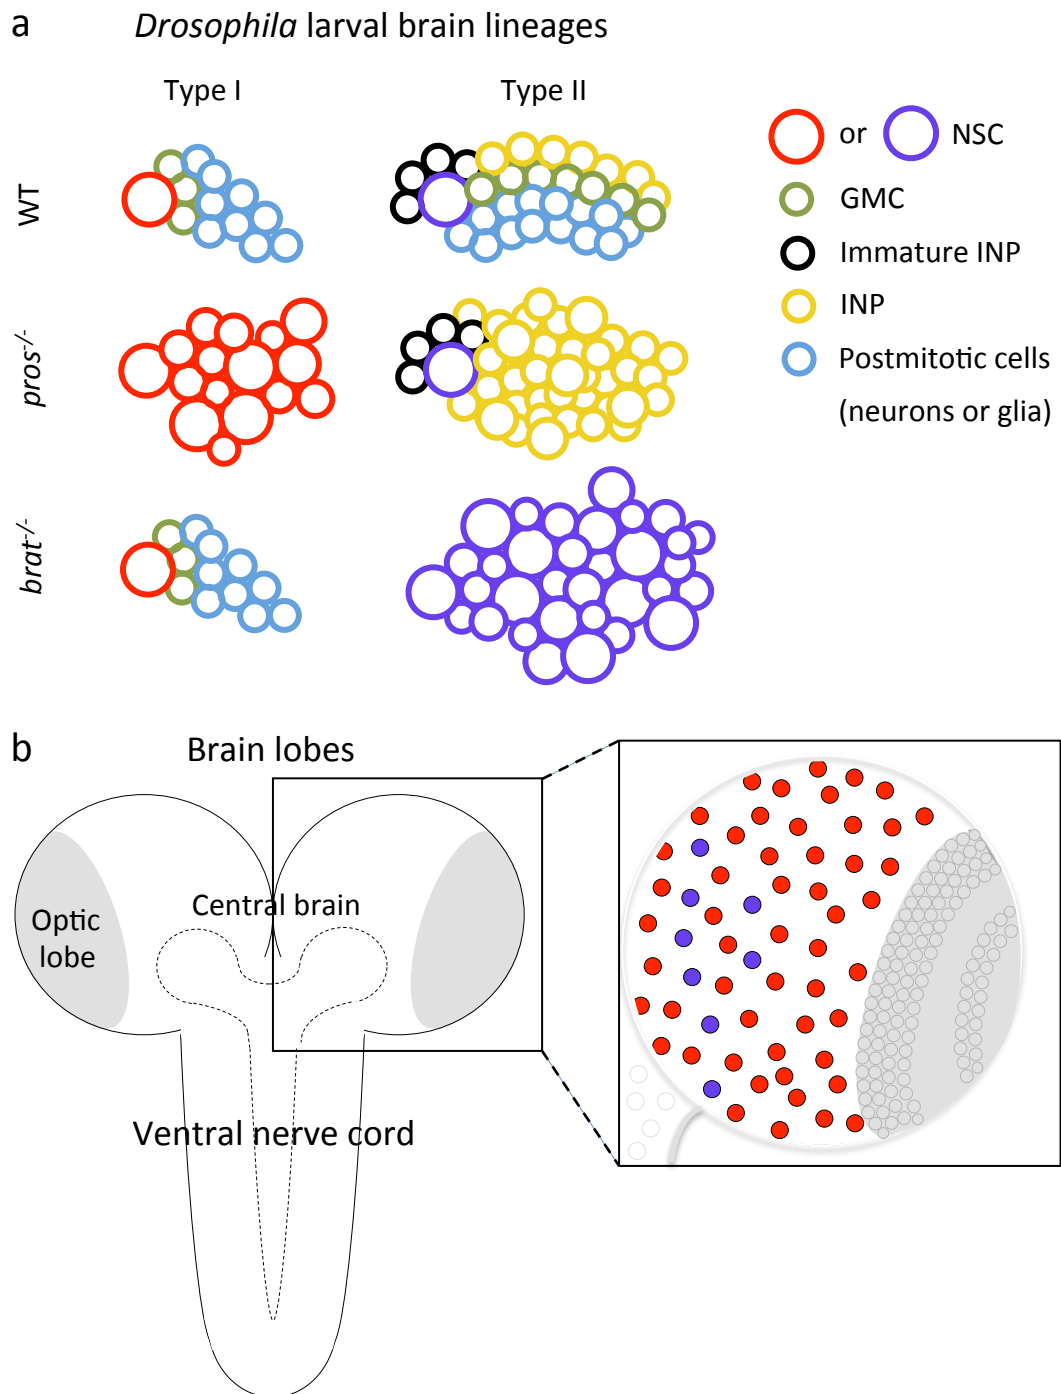

Supplement: supp [file elife_poa_e38393_Figure_1_figure_supplement_1.pdf › elife_poa_e38393_Figure_1_figure_supplement_1.pdf]
